# Supplementary material for: Mortality difference from Klebsiella aerogenes vs Enterobacter cloacae bloodstream infections
Source: PubMed Central journal article supplement (PMC10008348; doi:10.1099/acmi.0.000421), 2023-02-27
Supplement: acmi-5-421-s001.pdf [file acmi-5-421-s001.pdf]

## Supplemental Materials

### Supplemental Figure

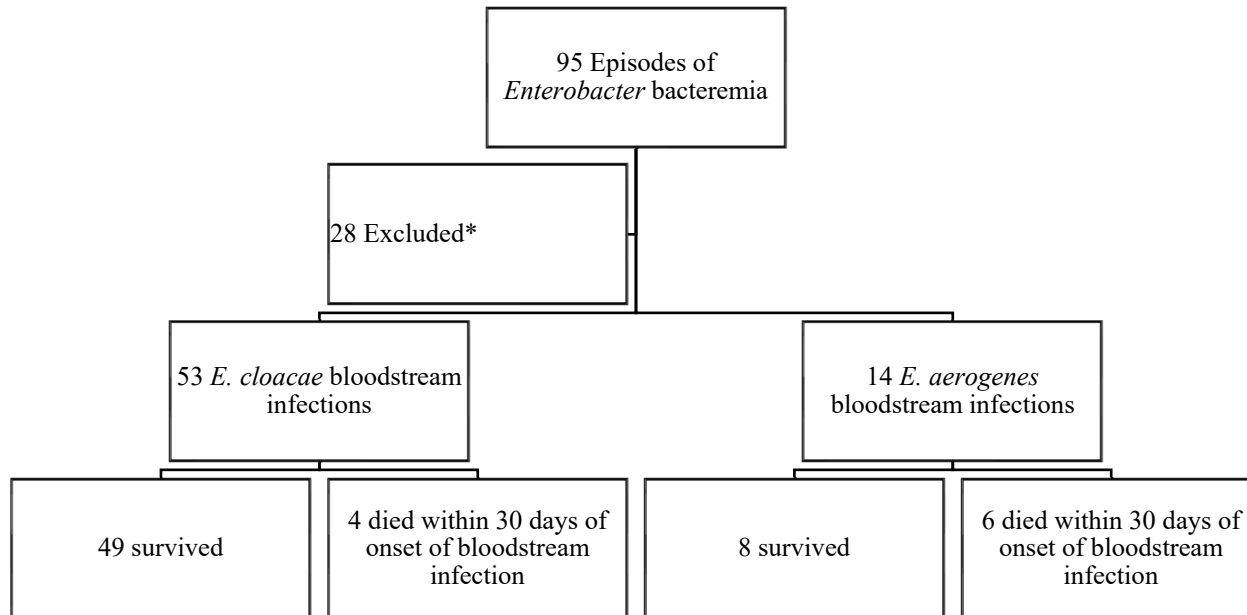

\*28 excluded due to: polymicrobial/concurrent infection (20), not first episode during study period (2), VITEK data not available (2), contaminant (2), post-mortem blood culture (2).

**Supplemental Table 1: Prior Clinical Studies Comparing *Klebsiella aerogenes* and *Enterobacter cloacae* complex**

| Variables                              | Song et al. 2010                                                        |                            | Huh et al. 2014                                                                                          | Wesevich et al. 2020                                                                     |                                    | Jeon et al. 2021                                                           | Álvarez-Marín et al. 2021                                                                                                                                                                                                                                                                  |
|----------------------------------------|-------------------------------------------------------------------------|----------------------------|----------------------------------------------------------------------------------------------------------|------------------------------------------------------------------------------------------|------------------------------------|----------------------------------------------------------------------------|--------------------------------------------------------------------------------------------------------------------------------------------------------------------------------------------------------------------------------------------------------------------------------------------|
| Setting (dates of study)               | Single-center<br>Asan Medical Center,<br>Seoul, South Korea (2005–2007) |                            | Single-center<br>Samsung Medical Center,<br>Seoul, South Korea (2004–2011)                               | Single-center<br>Duke University Medical<br>Center, Durham, United<br>States (2002–2015) |                                    | Single-center<br>Samsung Medical Center,<br>Seoul, South Korea (2010–2020) | Multi-center<br>Bellvitge University<br>Hospital (Barcelona),<br>Marqués de Valdecilla<br>University Hospital<br>(Santander), Reina Sofía<br>University Hospital, Virgen<br>del Rocío Hospital<br>(Cordoba), and Virgen<br>Macarena University<br>Hospital (Seville), Spain<br>(2009–2011) |
| Inclusion criteria                     | BSI occurred during hospitalization; First eligible BSI per patient     |                            | Age $\geq$ 16 years; Active treatment for cancer or within 1 year of BSI; First eligible BSI per patient | Age $\geq$ 18 years; First eligible BSI per patient                                      |                                    | Age $\geq$ 18 years; First eligible BSI per patient                        | Age $>$ 14 years; BSI occurred during hospitalization; First eligible BSI per patient                                                                                                                                                                                                      |
| Exclusion criteria                     | None                                                                    |                            | None                                                                                                     | Polymicrobial BSI; Blood culture drawn in outpatient setting                             |                                    | Polymicrobial BSI; Blood culture drawn in outpatient setting               | None                                                                                                                                                                                                                                                                                       |
| Number of patients                     | 239                                                                     |                            | 192                                                                                                      | 150                                                                                      |                                    | 282                                                                        | 285                                                                                                                                                                                                                                                                                        |
| Outcome(s)                             | BSI-related mortality                                                   | All-cause 28-day mortality | All-cause 30-day mortality                                                                               | In-hospital mortality                                                                    | Poor clinical outcome <sup>a</sup> | All-cause 30-day mortality                                                 | All-cause 30-day mortality                                                                                                                                                                                                                                                                 |
| % <i>Enterobacter cloacae</i> complex  | 4                                                                       | 8                          | 16                                                                                                       | 21                                                                                       | 40                                 | 24                                                                         | 19.4                                                                                                                                                                                                                                                                                       |
| % <i>Klebsiella aerogenes</i>          | 13                                                                      | 15                         | 31                                                                                                       | 28                                                                                       | 70                                 | 11                                                                         | 20.2                                                                                                                                                                                                                                                                                       |
| Statistical significance of outcome(s) | Adjusted OR 7.74 ( $P = 0.045$ )                                        | NR                         | Adjusted OR 2.55 ( $P = 0.04$ )                                                                          | Adjusted OR 1.20 ( $P = 0.8$ )                                                           | Adjusted OR 3.30 ( $P = 0.008$ )   | Adjusted OR 2.67 ( $P = 0.003$ )                                           | Chi-square $P = 0.87$                                                                                                                                                                                                                                                                      |
| Patient age, years                     | ECB: 53 (median)<br>KAB: 57 (median)                                    |                            | 57 (mean)                                                                                                | ECB: 57 (median)<br>KAB: 65 (median)                                                     |                                    | 60 (mean)                                                                  | 67 (median)                                                                                                                                                                                                                                                                                |
| % Male                                 | 56                                                                      |                            | 59                                                                                                       | 69                                                                                       |                                    | 61                                                                         | 66                                                                                                                                                                                                                                                                                         |
| Pitt bacteremia score                  | NR                                                                      |                            | 1.6                                                                                                      | NR                                                                                       |                                    | 1                                                                          | 1                                                                                                                                                                                                                                                                                          |
| APACHE II score                        | NR                                                                      |                            | NR                                                                                                       | 7.6                                                                                      |                                    | NR                                                                         | ECB: 19<br>KAB: 14                                                                                                                                                                                                                                                                         |
| % Septic shock at BSI presentation     | 13                                                                      |                            | NR                                                                                                       | NR                                                                                       |                                    | NR                                                                         | 9                                                                                                                                                                                                                                                                                          |
| Charlson score                         | NR                                                                      |                            | NR                                                                                                       | NR                                                                                       |                                    | ECB: 7 (median)<br>KAB: 6 (median)                                         | ECB: 2 (median)<br>KAB: 1 (median)                                                                                                                                                                                                                                                         |
| Malignancy, %                          | Hematologic: 18                                                         |                            | Hematologic: 30                                                                                          | Any malignancy: 40                                                                       |                                    | Any malignancy: 74                                                         | Hematologic: 7                                                                                                                                                                                                                                                                             |

|                                            | Solid tumor: 44 | Solid tumor: 69 |    |    | Solid tumor: 20 |
|--------------------------------------------|-----------------|-----------------|----|----|-----------------|
| % patients with:                           |                 |                 |    |    |                 |
| Diabetes mellitus                          | 13              | 16              | 35 | 24 | 24              |
| Cardiac disease                            | NR              | 5               | NR | 13 | 15              |
| Liver disease                              | 32              | 18              | NR | 33 | 47              |
| Renal disease                              | 4               | 3               | 19 | 27 | 53              |
| Pulmonary disease                          | NR              | 3               | NR | 3  | 13              |
| Neurological disease                       | NR              | 2               | NR | 13 | NR              |
| Transplantation                            | 7               | 3               | 11 | 12 | 5               |
| Neutropenia or leukopenia                  | 26              | 38              | NR | NR | 5               |
| Recent surgery                             | NR              | 14              | 39 | 19 | 34              |
| Central venous catheter                    | NR              | 41              | NR | 31 | 80              |
| Urinary catheter                           | NR              | 16              | NR | NR | 54              |
| Nosocomial acquisition                     | NR              | 51              | 48 | 77 | 73              |
| ICU care                                   | 21              | 5               | NR | 11 | 35              |
| Urinary source                             | 5               | 14              | 15 | 14 | 15              |
| Appropriate empiric antibiotics            | 90              | 82              | NR | 78 | NR              |
| Resistance to 3rd-generation cephalosporin | 51              | 28              | 35 | 29 | 42              |
| Resistance to 4th-generation cephalosporin | 18              | 6               | NR | 7  | 23              |

<sup>a</sup>As defined by Wesevich et al. (one or more of the following: death prior to discharge, recurrent bloodstream infection, or complication of bloodstream infection)  
APACHE II, acute physiology and chronic health evaluation; BSI, bloodstream infection; ECB, *Enterobacter cloacae* complex bacteremia; KAB, *Klebsiella aerogenes* bacteremia; ICU, intensive care unit; NR, not reported; OR, odds ratio

**Supplemental Table 2: Carbapenem MICs of *Enterobacter* spp. isolates**

|                   | Ertapenem MIC ( $\mu\text{g ml}^{-1}$ ) | Imipenem MIC ( $\mu\text{g ml}^{-1}$ ) | Number of isolates |    |
|-------------------|-----------------------------------------|----------------------------------------|--------------------|----|
| <b>Concordant</b> | $\leq 0.5$                              | $\leq 0.25$                            | 21                 | 57 |
| <b>Concordant</b> | $\leq 0.5$                              | $\leq 1$                               | 12                 |    |
| <b>Concordant</b> | $\leq 0.5$                              | 0.5                                    | 13                 |    |
| <b>Concordant</b> | $\leq 0.5$                              | 1                                      | 11                 |    |
| <b>Discordant</b> | $\leq 0.5$                              | 2                                      | 6                  | 10 |
| <b>Discordant</b> | 1                                       | $\leq 1$                               | 1                  |    |
| <b>Discordant</b> | 2                                       | $\leq 1$                               | 1                  |    |
| <b>Discordant</b> | 2                                       | 0.5                                    | 1                  |    |
| <b>Discordant</b> | 4                                       | $\leq 0.25$                            | 1                  |    |

Discordant: defined as discordant carbapenem susceptibilities (see Materials and Methods section)

## Supplemental References

Huh K, Kang CI, Kim J, Cho SY, Ha YE, et al. Risk factors and treatment outcomes of bloodstream infection caused by extended-spectrum cephalosporin-resistant *Enterobacter* species in adults with cancer. *Diagn Microbiol Infect Dis*. 2014; 78:172–7.

Song EH, Park KH, Jang EY, Lee EJ, Chong YP, et al. Comparison of the clinical and microbiologic characteristics of patients with *Enterobacter cloacae* and *Enterobacter aerogenes* bacteremia: a prospective observation study. *Diagn Microbiol Infect Dis*. 2010; 66:436–40.

Wesevich A, Sutton G, Ruffin F, Park LP, Fouts DE, et al. Newly named *Klebsiella aerogenes* (formerly *Enterobacter aerogenes*) is associated with poor clinical outcomes relative to other *Enterobacter* species in patients with bloodstream infection. *J Clin Microbiol*. 2020; 58:e00582–20.

Jeon M, Huh K, Ko JH, Cho SY, Huh HJ, et al. Difference in the clinical outcome of bloodstream infections caused by *Klebsiella aerogenes* and *Enterobacter cloacae* complex. *Open Forum Infect Dis*. 2021; 8:ofab390.

Álvarez-Marín R, Lepe JA, Gasch-Blasi O, Rodríguez-Martínez JM, Calvo-Montes J, et al. Clinical characteristics and outcome of bacteraemia caused by *Enterobacter cloacae* and *Klebsiella aerogenes*: more similarities than differences. *J Glob Antimicrob Resist*. 2021; 25:351–8.
